# Supplementary material for: Pro-Atherogenic and Pro-Oxidant Diets Influence Semen and Blood Traits of Rabbit Bucks
Source: MDPI journal article supplement (doi:10.3390/antiox12101880), 2023-10-19
Supplement: s1 [file s1]

**Table S1.** Semen quality of rabbit fed control (CNT), High Atherogenic (HA) and High Oxidative (HO) diets.

|          |     | Volume,<br>mL | concentration,<br>n. x 10E06 | Dead % | Static % | No mobile<br>progressive<br>% | Mobile<br>progressive<br>% | VCL, µm/s | VSL, µm/s | VAP, µm/s | LIN, % | ALH, µm | BCF, Hz |
|----------|-----|---------------|------------------------------|--------|----------|-------------------------------|----------------------------|-----------|-----------|-----------|--------|---------|---------|
| baseline | CNT | 0.33          | 395.31                       | 46.55  | 0.3      | 0.45                          | 0.25                       | 159.86    | 37.5      | 64.69     | 24.38  | 3.62    | 12.44   |
|          | HA  | 0.13          | 413.67                       | 35.83  | 0.15     | 0.58                          | 0.26                       | 158.89    | 39.17     | 69.12     | 25.73  | 3.51    | 12.6    |
|          | HO  | 0.46          | 456.33                       | 17.33  | 0.09     | 0.55                          | 0.37                       | 185.3     | 48.19     | 76.79     | 25.32  | 4.45    | 14.24   |
| T0       | CNT | 0.20          | 550.21                       | 40.00  | 0.48     | 0.39                          | 0.14                       | 164.34    | 32.34     | 62.24     | 19.61  | 3.24    | 11.67   |
|          | HA  | 0.49          | 493.27                       | 9.00   | 0.06     | 0.68                          | 0.25                       | 270.17    | 64.65     | 138.89    | 24.03  | 3.51    | 29      |
|          | HO  | 0.44          | 492.87                       | 12.00  | 0.19     | 0.74                          | 0.07                       | 212.93    | 39.59     | 102.92    | 18.27  | 3.02    | 17.56   |
| T1       | CNT | 0.15          | 502.41                       | 32.60  | 0.38     | 0.49                          | 0.14                       | 206.02    | 45.48     | 92.76     | 21.95  | 3.47    | 14.85   |
|          | HA  | 0.33          | 711.42                       | 26.88  | 0.31     | 0.55                          | 0.14                       | 171.12    | 36.69     | 82.45     | 21.74  | 2.03    | 14.43   |
|          | HO  | 0.53          | 667.88                       | 14.38  | 0.08     | 0.78                          | 0.13                       | 219.97    | 44.16     | 108.13    | 20.36  | 2.70    | 21.11   |
| T2       | CNT | 0.31          | 661.00                       | 29.50  | 0.15     | 0.70                          | 0.15                       | 262.3     | 57.46     | 131.17    | 21.81  | 3.11    | 19.80   |
|          | HA  | 0.51          | 605.84                       | 12.40  | 0.12     | 0.73                          | 0.14                       | 238.37    | 48.63     | 113.75    | 20.66  | 2.93    | 23.12   |
|          | HO  | 0.34          | 503.68                       | 15.13  | 0.11     | 0.65                          | 0.23                       | 209.43    | 47.88     | 102.21    | 22.95  | 3.00    | 24.06   |
| T3       | CNT | 0.43          | 550.64                       | 21.2   | 0.17     | 0.69                          | 0.14                       | 256.69    | 51.75     | 123.91    | 20.1   | 3.43    | 18.63   |
|          | HA  | 0.55          | 459.48                       | 15.9   | 0.16     | 0.59                          | 0.26                       | 219.18    | 52.07     | 103.86    | 23.75  | 3.12    | 26.50   |
|          | HO  | 0.45          | 638.92                       | 20.88  | 0.28     | 0.59                          | 0.13                       | 190.73    | 39.58     | 93.65     | 20.82  | 2.58    | 21.91   |
| T4       | CNT | 0.26          | 461.38                       | 21.50  | 0.50     | 0.42                          | 0.08                       | 211.34    | 38.26     | 97.87     | 18.04  | 2.62    | 10.58   |
|          | HA  | 0.28          | 470.77                       | 23.10  | 0.19     | 0.67                          | 0.14                       | 191.90    | 39.12     | 88.95     | 20.33  | 2.51    | 18.60   |
|          | HO  | 0.50          | 272.22                       | 20.50  | 0.35     | 0.47                          | 0.18                       | 192.67    | 43.29     | 84.04     | 22.53  | 2.48    | 15.46   |
| T5       | CNT | 0.23          | 437.90                       | 12.67  | 0.17     | 0.69                          | 0.14                       | 242.09    | 48.15     | 116.16    | 19.79  | 3.32    | 18.95   |
|          | HA  | 0.42          | 592.74                       | 11.00  | 0.16     | 0.73                          | 0.11                       | 239.76    | 46.4      | 118.95    | 19.51  | 3.11    | 18.90   |
|          | HO  | 0.66          | 550.85                       | 17.17  | 0.19     | 0.71                          | 0.10                       | 273.54    | 50.45     | 136.11    | 18.43  | 3.35    | 22.84   |

|       |              |       |        |        |        |        |        |        |       |        |       |       |       |
|-------|--------------|-------|--------|--------|--------|--------|--------|--------|-------|--------|-------|-------|-------|
| T6    | CNT          | 0.41  | 456.93 | 9.50   | 0.23   | 0.67   | 0.10   | 250.44 | 50.32 | 126.49 | 19.61 | 2.94  | 18.21 |
|       | HA           | 0.35  | 704.26 | 17.2   | 0.21   | 0.65   | 0.15   | 184.26 | 39.12 | 85.94  | 21.28 | 2.60  | 19.72 |
|       | HO           | 0.69  | 600.78 | 18.5   | 0.14   | 0.70   | 0.16   | 225.54 | 48.20 | 118.76 | 21.27 | 2.80  | 23.94 |
| T7    | CNT          | 0.53  | 536.59 | 10     | 0.15   | 0.78   | 0.07   | 307.33 | 54.05 | 162.09 | 17.81 | 3.62  | 14.42 |
|       | HA           | 0.35  | 470.77 | 23.00  | 0.26   | 0.63   | 0.12   | 212.61 | 46.08 | 106.29 | 21.70 | 2.68  | 20.21 |
|       | HO           | 0.40  | 709.84 | 17.5   | 0.1    | 0.75   | 0.15   | 228.49 | 52.72 | 123.08 | 22.47 | 2.98  | 24.09 |
| T8    | CNT          | 0.53  | 447.22 | 18.50  | 0.18   | 0.74   | 0.09   | 244.85 | 45.23 | 118.88 | 18.52 | 3.03  | 17.05 |
|       | HA           | 0.34  | 670.53 | 25.00  | 0.44   | 0.49   | 0.07   | 188.64 | 35.88 | 96.74  | 19.22 | 2.64  | 10.81 |
|       | HO           | 0.67  | 634.00 | 21.50  | 0.28   | 0.61   | 0.11   | 248.21 | 43.35 | 127.85 | 17.33 | 3.1   | 22.97 |
| RMSE  |              | 0.147 | 4.355  | 1.044  | 0.119  | 0.116  | 0.097  | 2.047  | 1.02  | 1.558  | 0.588 | 0.272 | 0.794 |
| Sign. | Group        | 0.003 | 0.410  | 0.011  | 0.012  | 0.157  | 0.208  | 0.016  | 0.851 | 0.053  | 0.143 | 0.110 | 0.001 |
|       | Time         | 0.330 | 0.240  | <0.001 | 0.005  | 0.001  | <0.001 | <0.001 | 0.121 | <0.001 | 0.010 | 0.026 | 0.004 |
|       | Group x Time | 0.196 | 0.674  | <0.001 | <0.001 | <0.001 | 0.312  | <0.001 | 0.019 | <0.001 | 0.766 | 0.763 | 0.059 |

VCL: curvilinear velocity; VSL: Linear Velocity; VAP: Average Path Velocity; LIN: linearity; ALH: amplitude of lateral head displacement; BCF: beat cross frequency; RMSE: Root Mean Standard Error
